# Supplementary material for: Trends of Microdiversity Reveal Depth-Dependent Evolutionary Strategies of Viruses in the Mediterranean
Source: PubMed Central journal article supplement (PMC6832022; doi:10.1128/msystems.00554-19), 2019-11-05

Chlorophyll (mg/m<sup>3</sup>)

0.0 0.2 0.4 0.6

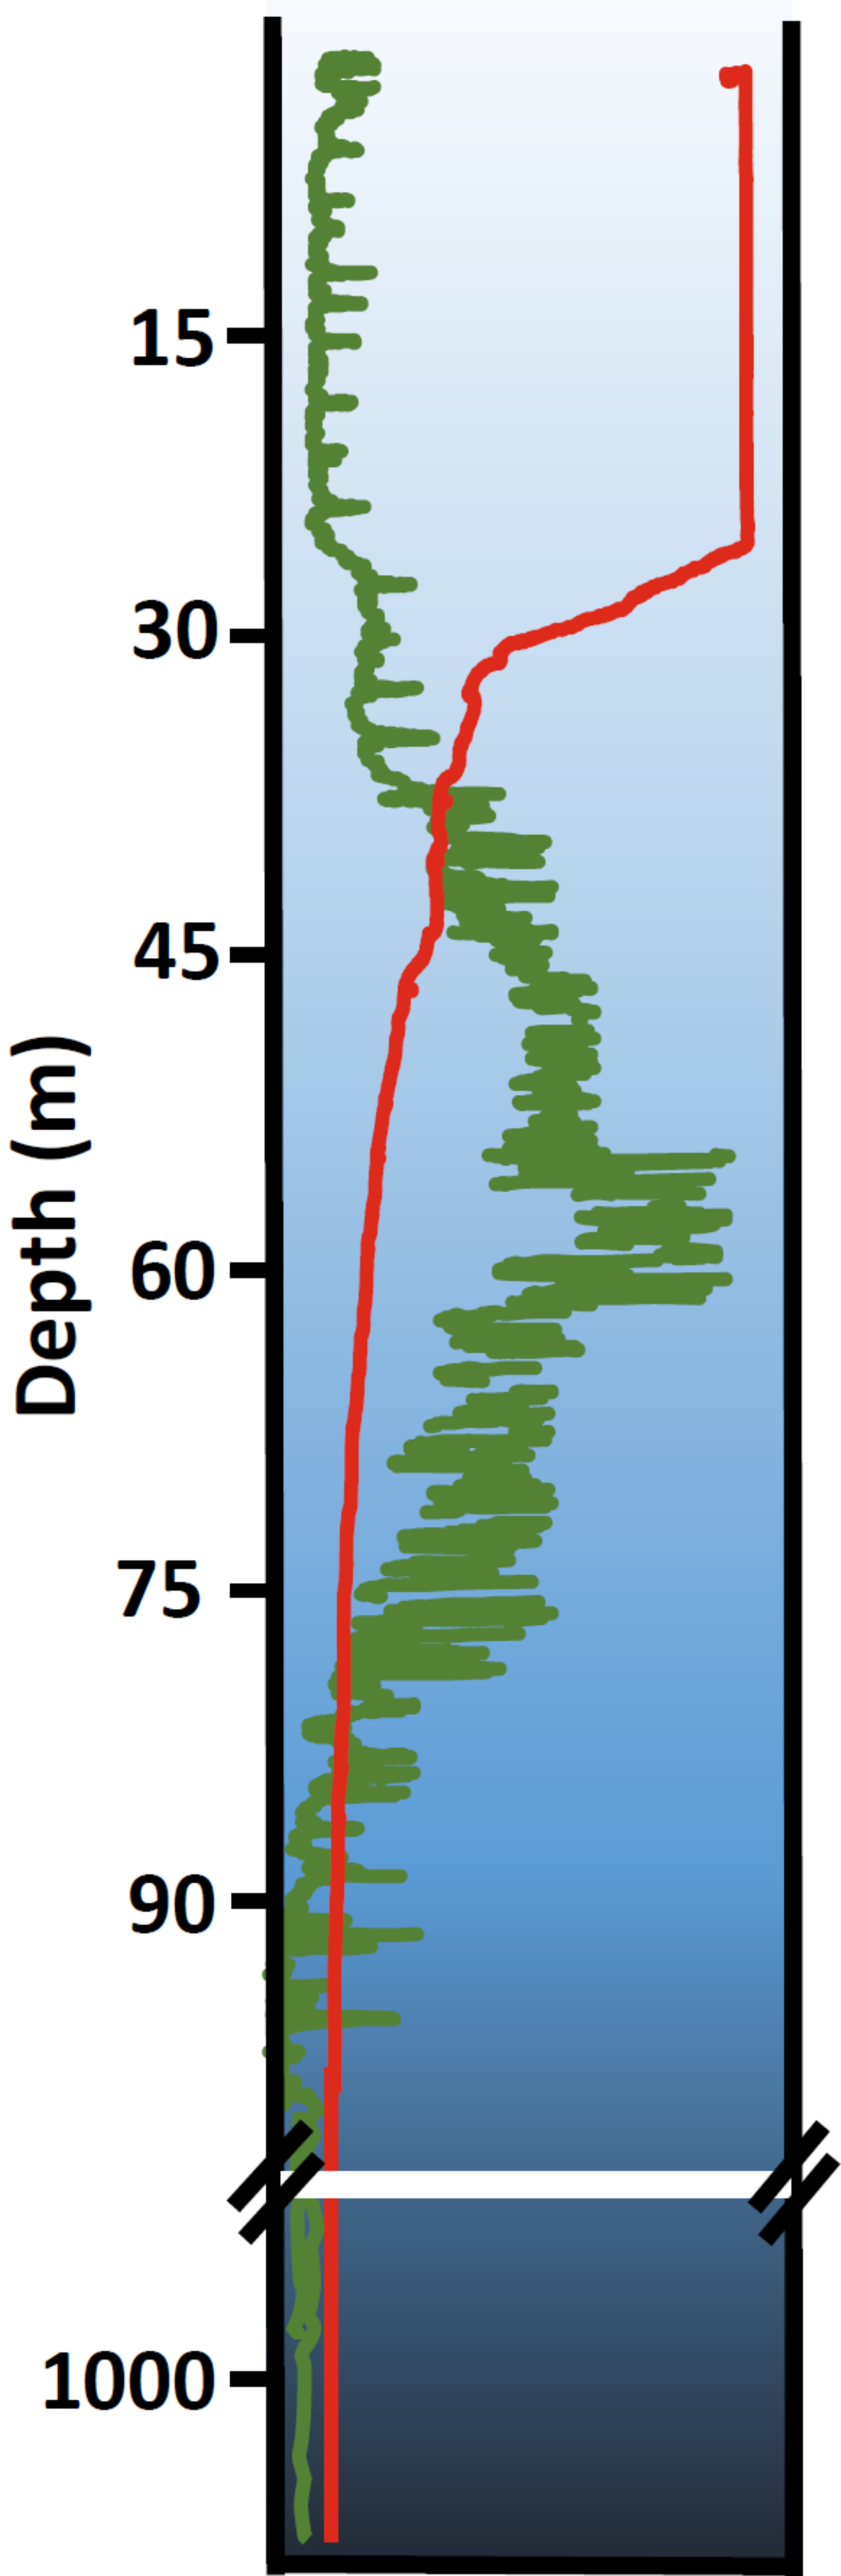

Supplement: mSystems.00554-19-sf001.pdf [file mSystems.00554-19-sf001.pdf]
